# Supplementary material for: Immunogenicity, safety and clinical outcomes of the SARS-CoV-2 BNT162b2 vaccine in adolescents with type 1 diabetes
Source: Frontiers journal article supplement (doi:10.3389/fped.2023.1191706), 2023-06-26

## Supplementary Figure 1A

Bar graph representing percentage of COVID-19 infection-naïve adolescents with T1D and COVID-19 infection-naïve healthy controls reporting local and systemic reactions after dose 1 of the BNT162b2 vaccine.

Abbreviations: T1D, type 1 diabetes.

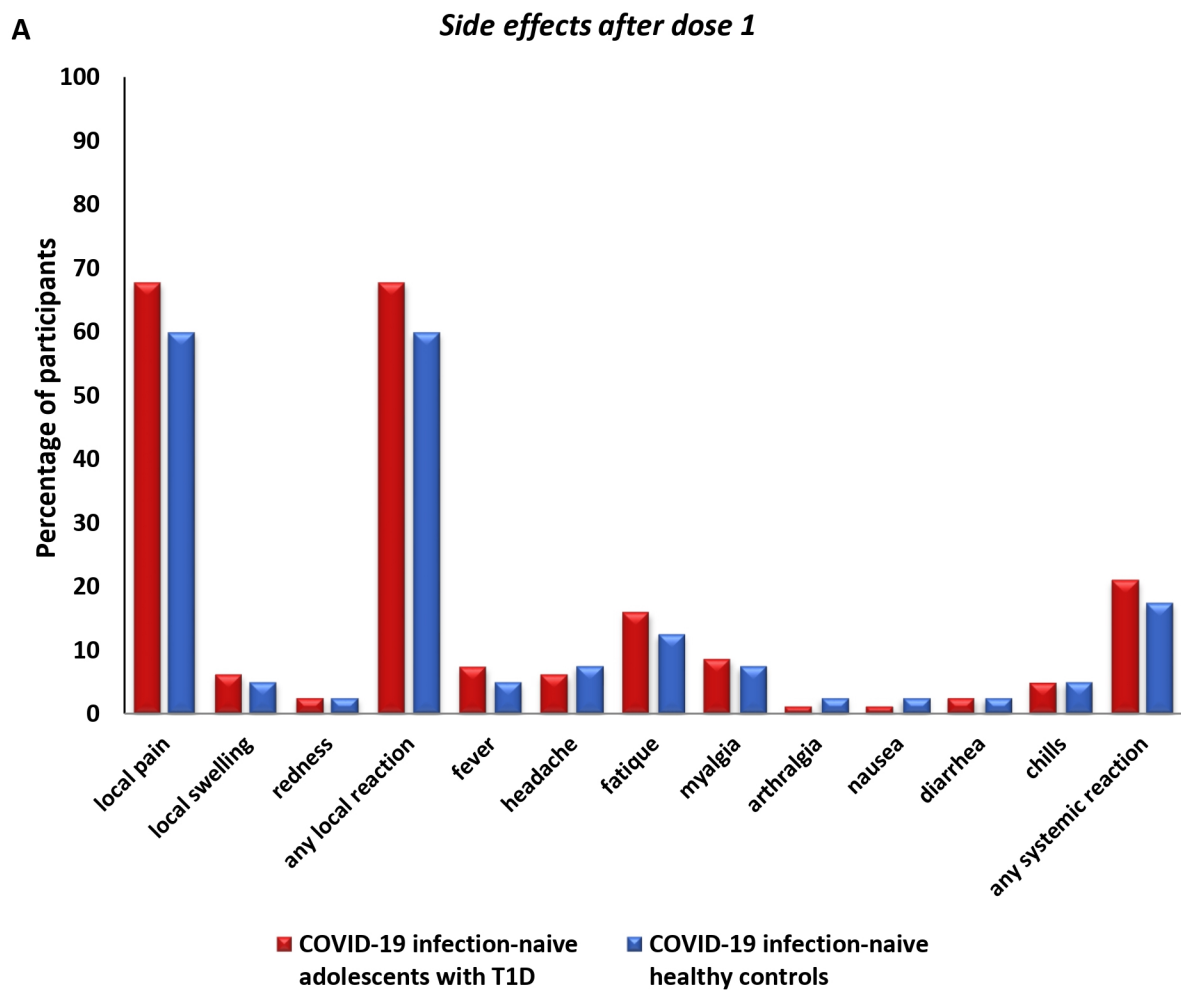

## Supplementary Figure 1B

Bar graph representing percentage of COVID-19 infection-naïve adolescents with T1D and COVID-19 infection-naïve healthy controls reporting local and systemic reactions after dose 2 of the BNT162b2 vaccine.

Abbreviations: T1D, type 1 diabetes.

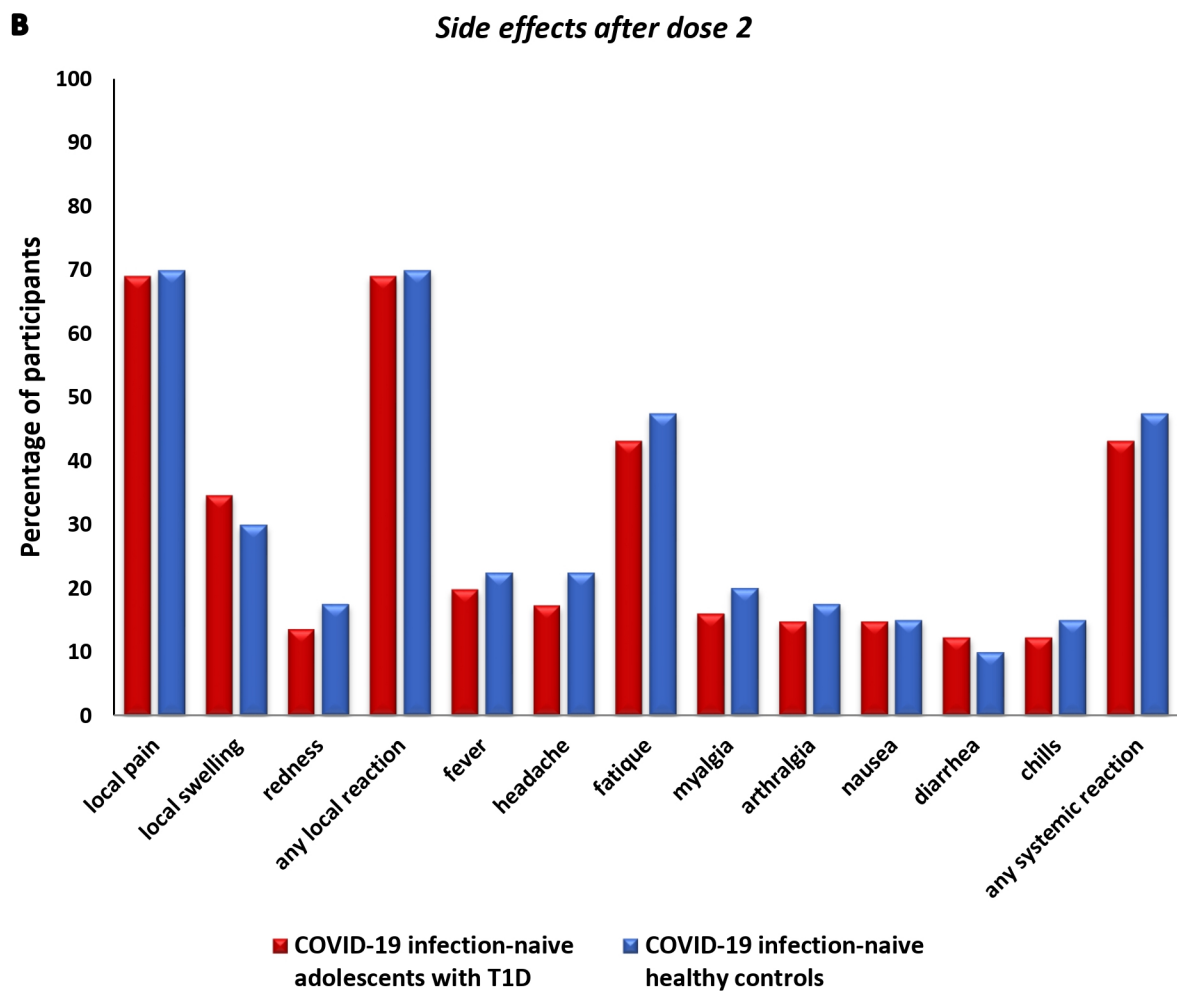

Supplement: Image_1.pdf [file Image_1.pdf]
